# Supplementary material for: DNA Ligase III Promotes Alternative Nonhomologous End-Joining during Chromosomal Translocation Formation
Source: PubMed Central journal article supplement (PMC3107202; doi:10.1371/journal.pgen.1002080), 2011-06-02

Figure S3

A) Surveyor nuclease assay for Lig3 null and nuclear Lig3-deficient cells

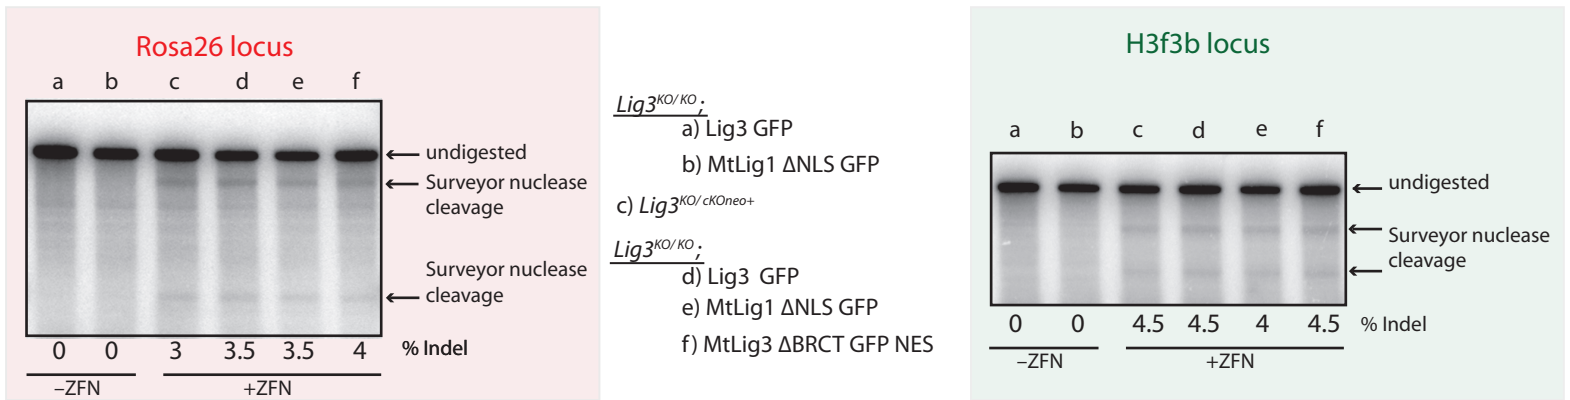

B) Bacterial colony hybridization for Lig3 null and nuclear Lig3-deficient cells

|                                                             | % Indel       |               |
|-------------------------------------------------------------|---------------|---------------|
|                                                             | Rosa26 locus  | H3f3b locus   |
| <i>Lig3<sup>KO/KO</sup>;</i><br><i>Lig3 GFP</i>             | 6/117 = 5.1 % | 2/64 = 3 %    |
| <i>Lig3<sup>KO/KO</sup>;</i><br><i>MtLig1 ΔBRCT GFP NES</i> | 4/90 = 4.4 %  | 5/113 = 4.4 % |

*Lig3<sup>KO/KO</sup>;* *Lig3 GFP*

AAGACTCCCGCCCAT CTTCTAGAAAGACTGGAGTTGCAGA

del 133 TCTAGAAAGACTGGAGTTGCAGA

AAGACTCCCGCCCAT CTAGAAAGACTGGAGTTGCAGA

AAGACTCCCGCCCA GAAAGACTGGAGTTGCAGA

AAGACTCCCGCCCAT CTTTCAGAAAGACTGGAGTTGCAGA

AAGACT GGAGTTGCAGA

AAGACTCCCGCCCATCT AGAAAGACTGGAGTTGCAGA

*Lig3<sup>KO/KO</sup>;* *Lig3 GFP*

GCCCAAAGACATCCAGTTGG CTCGCCGGATACGGGGGGAGAGA

GCCCAAAGACATC GGGGGAGAGA

GCCCAAAGACATCCAG ATA CGGATACGGGGGGAGAGA

*Lig3<sup>KO/KO</sup>;* *MtLig1 ΔBRCT GFP NES*

AAGACTCCCGCCCAT CTTCTAGAAAGACTGGAGTTGCAGA

AAGACTCCCGCCCAT TTTT TAGAAAGACTGGAGTTGCAGA

del 122 CAGA

AAGACTCCCGCCCAT AGAAAGACTGGAGTTGCAGA

AAGACTCCCG AAAGACTGGAGTTGCAGA

*Lig3<sup>KO/KO</sup>;* *MtLig1 ΔBRCT GFP NES*

GCCCAAAGACATCCAGTTGG CTCGCCGGATACGGGGGGAGAGA

G GGGGTGA GATACGGGGGGAGAGA

GCCCAAAGACATCCAGTTGGCTCGCTCGCCGGATACGGGGGGAGAGA

GCCCA CCGGATACGGGGGGAGAGA

GCCCAAAGACATCCAGTTG CTCGCCGGATACGGGGGGAGAGA

GCCCAAAGACATC GCCGGATACGGGGGGAGAGA

Figure S3

C) Surveyor nuclease assay for Lig1 knock down

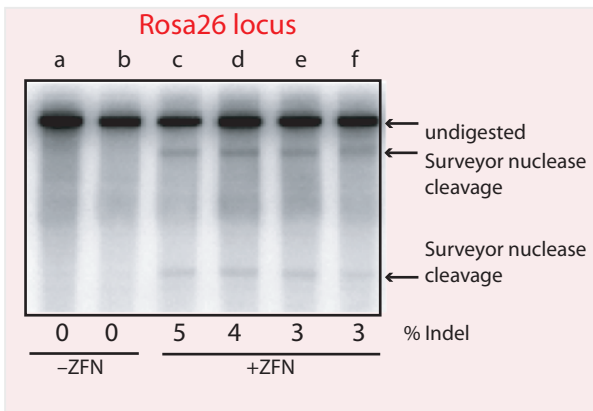

*Lig3*<sup>KO/KO</sup>;

- a) Lig3 GFP
- b) MtLig3 ΔBRCT GFP NES
- c) Lig3 GFP +scr shRNA
- d) Lig3 GFP +Lig1 shRNA
- e) MtLig3 ΔBRCT GFP NES +scr shRNA
- f) MtLig3 ΔBRCT GFP NES +Lig1 shRNA

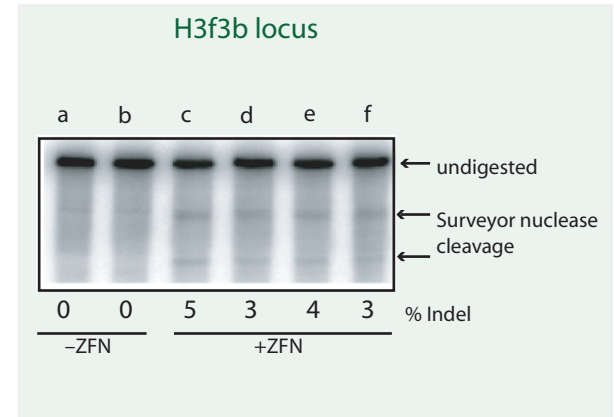

Supplement: pgen.1002080.s003.pdf [file pgen.1002080.s003.pdf]
