# Supplementary material for: DNA Ligase III Promotes Alternative Nonhomologous End-Joining during Chromosomal Translocation Formation
Source: PubMed Central journal article supplement (PMC3107202; doi:10.1371/journal.pgen.1002080), 2011-06-02
Supplement: pgen.1002080.s004.pdf [file pgen.1002080.s004.pdf]

Figure S4

| statistics for<br>microhomology distribution      | <i>P</i> value |         |
|---------------------------------------------------|----------------|---------|
|                                                   | a              | b       |
| <i>Lig3</i> <sup>KO/KO</sup> ;<br><i>Lig3</i> GFP |                | <0.0001 |
| <i>Lig3</i> GFP + Lig1 shRNA                      | 0.7859         | <0.0001 |
| <i>Xrcc4</i> <sup>-/-</sup>                       | 0.6905         | <0.0001 |
| <i>Lig3</i> <sup>KO/KO</sup> ;                    |                |         |
| <i>MtLig3</i> ΔBRCT GFP NES                       | <0.0001        | 0.6935  |
| <i>MtLig1</i> GFP                                 | 0.0008         | 0.0834  |
| <i>MtLig1</i> ΔNLS GFP                            | 0.0002         | 0.2616  |
| <i>Lig3</i> ΔBRCT GFP                             | 0.9112         | <0.0001 |
| <i>Lig3</i> ΔZNF GFP                              | 0.3426         | <0.0001 |
