# Supplementary material for: DNA Ligase III Promotes Alternative Nonhomologous End-Joining during Chromosomal Translocation Formation
Source: PubMed Central journal article supplement (PMC3107202; doi:10.1371/journal.pgen.1002080), 2011-06-02
Supplement: pgen.1002080.s005.pdf [file pgen.1002080.s005.pdf]

Figure S5

| A) <i>Lig3</i> <sup>KO/ckOneo+</sup> |                        | Chr. 6                  | Chr. 11                      |
|--------------------------------------|------------------------|-------------------------|------------------------------|
|                                      | CAGAAGACTCCCGCCCATCTTC |                         | (G)CTCGCCGGATACGGGGGGAGAGAGC |
| Translocation clones                 |                        | Translocation junctions |                              |
| E2bE1                                | CAGAAGACTCCCGCCCATCTTC |                         | GCTCGCCGGATACGGGGGGAGAGAGC   |
| E2bG2                                | CAGAAGACTCCCGCCCATCTT  |                         | CTCGCCGGATACGGGGGGAGAGAGC    |
| E1bH3                                | CAGAAGACTCCCGCCCATCT   |                         | GCTCGCCGGATACGGGGGGAGAGAGC   |
| E1E11                                | CAGAAGACTCCCGCCCATCT   | +185 inser.             | GCTCGCCGGATACGGGGGGAGAGAGC   |
| E2bA1                                | CAGAAGACTCCCGCCCATC    |                         | CTCGCCGGATACGGGGGGAGAGAGC    |
| E1C8                                 | CAGAAGACTCCCGCCCATCTTC |                         | GCCGGATACGGGGGGAGAGAGC       |
| E2D1                                 | CAGAAGACTCCCGCCCATCTTC |                         | GCCGGATACGGGGGGAGAGAGC       |
| E2bD5                                | CAGAAGACTCCCGCCCATCTTC |                         | GCCGGATACGGGGGGAGAGAGC       |
| E2bE2                                | CAGAAGACTCCCGCCCATCTTC | TCGATACGGA              | CGGATACGGGGGGAGAGAGC         |
| E1H8                                 | CAGAAGACTCCCGCCCAT     |                         | GCTCGCCGGATACGGGGGGAGAGAGC   |
| E2B6                                 | CAGAAGACTCCCGCCCAT     |                         | GCTCGCCGGATACGGGGGGAGAGAGC   |
| E2H12                                | CAGAAGACTCCCGCCCAT     |                         | GCTCGCCGGATACGGGGGGAGAGAGC   |
| E1G6                                 | CAGAAGACTCCCGCCCATCT   |                         | CGCCGGATACGGGGGGAGAGAGC      |
| E2C2                                 | CAGAAGACTCCCGCCCATCT   |                         | CGCCGGATACGGGGGGAGAGAGC      |
| E2A12                                | CAGAAGACTCCCGCCCATCT   |                         | CGCCGGATACGGGGGGAGAGAGC      |
| E2bB1                                | CAGAAGACTCCCGCCCATCT   |                         | CGCCGGATACGGGGGGAGAGAGC      |
| E2F9                                 | CAGAAGACTCCCGCCCATCT   |                         | GCCGGATACGGGGGGAGAGAGC       |
| E2A1                                 | CAGAAGACTCCCGCCC       |                         | GCTCGCCGGATACGGGGGGAGAGAGC   |
| E2bF6                                | CAGAAGACTCCCGCCC       |                         | GCTCGCCGGATACGGGGGGAGAGAGC   |
| E2E11                                | CAGAAGACTCCCGCCCATC    | GTATC                   | CGGATACGGGGGGAGAGAGC         |
| E1E9                                 | CAGAAGACTCCCGCCCATCT   |                         | CGGATACGGGGGGAGAGAGC         |
| E2bC3                                | CAGAAGACTCCCGCCC       |                         | TCGCCGGATACGGGGGGAGAGAGC     |
| E2bC8                                | CAGAAGACTCCCGCCC       |                         | TCGCCGGATACGGGGGGAGAGAGC     |
| E1F7                                 | CAGAAGACTCCCGCCCATC    |                         | CGGATACGGGGGGAGAGAGC         |
| E1B7                                 | CAGAAGACTCCCGCCCAT     | GCTCA                   | CCGGATACGGGGGGAGAGAGC        |
| E1bE2                                | CAGAAGACTCCCGCCCA      | AAA                     | CCGGATACGGGGGGAGAGAGC        |
| E2bE12                               | CAGAAGACTCCCGCCCA      | AAAAAAA                 | CCGGATACGGGGGGAGAGAGC        |
| E2H7                                 | CAGAAGACTCCCGCCC       |                         | CGGATACGGGGGGAGAGAGC         |
| E2F1                                 | CAGAAGACTCCCGCC        | T                       | CCGGATACGGGGGGAGAGAGC        |
| E1G11                                | CAGAAGACTCCCGCCC       |                         | GGATACGGGGGGAGAGAGC          |
| E2F7                                 | CAGAAGACTCCCGCCC       |                         | GGATACGGGGGGAGAGAGC          |
| E2bG7                                | CAGAAGACTCCCGCCC       |                         | GGATACGGGGGGAGAGAGC          |
| E2bE10                               | CAGAAGACTCCCGCC        | +12 inser.              | CGGATACGGGGGGAGAGAGC         |
| E1H4                                 | CAGAAGACTCCCGCCC       | +20 inser.              | GGATACGGGGGGAGAGAGC          |
| E1F3                                 | CAGAAGACTCCCGCC        |                         | GGATACGGGGGGAGAGAGC          |
| E1B8                                 | CAGAAGACTCCCGCC        |                         | GGATACGGGGGGAGAGAGC          |
| E1D9                                 | CAGAAGACTCCCGCC        |                         | GGATACGGGGGGAGAGAGC          |
| E2G10                                | CAGAAGACTCCCGCC        |                         | GGATACGGGGGGAGAGAGC          |
| E2bD4                                | CAGAAGACTCCCGCC        |                         | GGATACGGGGGGAGAGAGC          |
| E2bE7                                | CAGAAGACTCCCGCC        |                         | GGATACGGGGGGAGAGAGC          |
| E1G1                                 | CAGAAGACTCCCGC         |                         | GGATACGGGGGGAGAGAGC          |
| E2E2                                 | CAGAAGACTCCCG          |                         | GGGGGAGAGAGC                 |
| E2bG12                               | CAGAAGACTC             |                         | GCCGGATACGGGGGGAGAGAGC       |
| E1C10                                | CAGAAGACTCCCGCCCATC    |                         | GGGGGAGAGAGC                 |
| E2bF9                                | CAGAAG                 |                         | GCTCGCCGGATACGGGGGGAGAGAGC   |
| E1bF7                                | CAGAAGACTCCCGCCCA      |                         | CGGGGGGAGAGAGC               |
| E2H9                                 | CAGAAGACTCCCG          |                         | GATACGGGGGGAGAGAGC           |
| E2bH5                                | CAGAAGACTCCCG          |                         | GATACGGGGGGAGAGAGC           |
| E2bC10                               | CAGAAGACTCCCG          |                         | GATACGGGGGGAGAGAGC           |
| E1F2                                 | CAGAAGACTCC            |                         | GGATACGGGGGGAGAGAGC          |
| E1G3                                 | CAGAAGACTCCCGC         |                         | GGGGGGAGAGAGC                |
| E2E12                                | CAGAAGACTCCCGCCCA      |                         | GGGAGAGAGC                   |
| E1B12                                | CAGAAGACTCCCG          |                         | GGGGGAGAGAGC                 |

Figure S5, con't.

A) *Lig3*<sup>KO/ckOneo+</sup>

|                      |                                | Chr. 6                          |                         | Chr. 11                      |     |
|----------------------|--------------------------------|---------------------------------|-------------------------|------------------------------|-----|
|                      |                                | CAGAA <u>GACTCCCGCCCA</u> TCTTC |                         | (G)CTCGCCGGATACGGGGGGAGAGAGC |     |
| Translocation clones |                                |                                 | Translocation junctions |                              |     |
| E1H3                 | CAGAA <u>GACTCCCG</u>          |                                 |                         | GATACGGGGGGAGAGAGC           |     |
| E1A5                 | CAGAA <u>GACTCCCG</u>          |                                 |                         | GATACGGGGGGAGAGAGC           |     |
| E1bB3                | CAGAA <u>GACTCCCGCCCA</u> T    |                                 |                         | GAGC                         |     |
| E1B6                 | CAGAA <u>GAC</u>               |                                 |                         | CGGATACGGGGGGAGAGAGC         |     |
| E2C5                 | CAGAA <u>GACTCCCGCC</u>        | TTA                             |                         | AGAGAGC                      |     |
| E2bA5                | CAGAA <u>GAC</u>               |                                 |                         | GGGGGGAGAGAGC                |     |
| E2bH5                | CCC                            |                                 |                         | GATACGGGGGGAGAGAGC           |     |
| E1bA7                | CAGAA <u>GACT</u>              | G                               |                         | CGGGGGAGAGAGC                |     |
| E1C9                 | CAG <u>A</u>                   |                                 |                         | GAGC                         |     |
| E1B10                | GGT -39del                     |                                 |                         | GCTCGCCGGATACGGGGGGAGAGAGC   |     |
| E1G12                | CAGAA <u>GACTCCCGC</u>         |                                 |                         | -38del                       | GGT |
| E2C1                 | <u>AAG</u> -27del              |                                 |                         | AGAGC                        |     |
| E2F4                 | AGC -26del                     | +36 inser.                      |                         |                              | AGC |
| E2bC6                | CAG <u>AAG</u>                 |                                 |                         | -37del                       | CGG |
| E1bD12               | CAG <u>AAG</u>                 |                                 |                         | -37del                       | CGG |
| E1H2                 | <u>TTTAAG</u>                  |                                 |                         | -30del                       | TTG |
| E1D5                 | TCC -68del                     | +48 inser.                      |                         | GATACGGGGGGAGAGAGC           |     |
| E1H5                 | <u>ACC</u> -78del              |                                 |                         | GGATACGGGGGGAGAGAGC          |     |
| E2bC11               | <u>ACA</u> -47del              |                                 |                         | -52del                       | TTT |
| E1G5                 | AAA -135del                    | +432 inser.                     |                         | CCGGATACGGGGGGAGAGAGC        |     |
| E2bC6                | CAGAA <u>GACTCCCG</u>          |                                 |                         | GATACGGGGGGAGAGAGC           |     |
| E1E2                 | CAGAA <u>GACTCCCGCCCA</u> TCTT | +67 inser.                      |                         | -84del                       | TTA |

Figure S5, con't.

B) *Lig3*<sup>KO/KO</sup>; *MtLig3* ΔBRCT GFP NES

| Translocation clones | Chr. 6                   |                               | Chr. 11                    |
|----------------------|--------------------------|-------------------------------|----------------------------|
|                      | CAGAA GACTCCCGCCCA TCTTC | (G) CTCGCCGATACGGGGG GAGAGAGC | Translocation junctions    |
| E1E10                | CAGAA GACTCCCGCCCA TCTTC |                               | CTCGCCGATACGGGGG GAGAGAGC  |
| E3D1                 | CAGAA GACTCCCGCCCA TCTTC |                               | GCCGGATACGGGGG GAGAGAGC    |
| E1C9                 | CAGAA GACTCCCGCCCA TCTTC |                               | CCGGATACGGGGG GAGAGAGC     |
| E3G9                 | CAGAA GACTCCCGCCCA T     |                               | GCTCGCCGATACGGGGG GAGAGAGC |
| E4F2                 | CAGAA GACTCCCGCCCA T     | GA                            | GCTCGCCGATACGGGGG GAGAGAGC |
| E1E2                 | CAGAA GACTCCCGCCCA TCT   |                               | GCCGGATACGGGGG GAGAGAGC    |
| E1D4                 | CAGAA GACTCCCGCCCA TC    |                               | GCCGGATACGGGGG GAGAGAGC    |
| E1H9                 | CAGAA GACTCCCGCCCA TC    |                               | GCCGGATACGGGGG GAGAGAGC    |
| E1H5                 | CAGAA GACTCCCGCCCA       |                               | CGCCGGATACGGGGG GAGAGAGC   |
| E1E11                | CAGAA GACTCCCGCCCA T     |                               | CCGGATACGGGGG GAGAGAGC     |
| E3F1                 | CAGAA GACTCCCGCCCA       |                               | CCGGATACGGGGG GAGAGAGC     |
| E1G1                 | CAGAA GACTCCCGCC C       |                               | GCCGGATACGGGGG GAGAGAGC    |
| E2E12                | CAGAA GACTCC C           | +225 bp                       | CTCGCCGATACGGGGG GAGAGAGC  |
| E1F3                 | CAGAA GACTCC             | GC                            | CCGGATACGGGGG GAGAGAGC     |
| E2B5                 | CAGAA GACTCCCGCCCA TCTTC | G                             | GGGGG GAGAGAGC             |
| E3G3                 | CAGAA GACTCCCGCCCA A     |                               | TACGGGGG GAGAGAGC          |
| E2F8                 | CAGAA GAC C              |                               | CGGATACGGGGG GAGAGAGC      |
| E3F8                 | CAGAA GACT               | T                             | CCGGATACGGGGG GAGAGAGC     |
| E4H1                 | CAGAA GACTCC             |                               | GATACGGGGG GAGAGAGC        |
| E2G10                | CAGAA GACTCCCGCC C       |                               | GGGGG GAGAGAGC             |
| E3H3                 | CAGAA GACTCC             | A                             | GATACGGGGG GAGAGAGC        |
| E1A8                 | CAGAA GA                 |                               | GGATACGGGGG GAGAGAGC       |
| E1F2                 | CAGAA GACTCCCGCC C       |                               | GGGGG GAGAGAGC             |
| E3A6                 | CAG                      |                               | GCCGGATACGGGGG GAGAGAGC    |
| E3F3                 | CAGAA GACT               |                               | TACGGGGG GAGAGAGC          |
| E4H2                 | CAGAA GACTCCCG C         |                               | GGGGAGAGAGC                |
| E4D8                 | CAGAA GACTCCCGCCCA       | AGCTACGG                      | AGAGAGC                    |
| E4G8                 | CAGA                     |                               | TACGGGGG GAGAGAGC          |
| E4E9                 | CAGAA GACTCCCG           |                               | GAGAGC                     |
| E4H5                 | CAGA                     |                               | CGGGG GAGAGAGC             |
| E3F2                 | CAGAA GACT               |                               | GC                         |
| E1C1                 | CAGG T -40 del           |                               | ACGGGGG GAGAGAGC           |
| E3C5                 | CAGAA GACT C             |                               | -69 del TAAG               |
| E2H8                 | TTCAA -73 del            | +69 bp                        | ACGGGGG GAGAGAGC           |
| E3D9                 | GTTA -37 del             |                               | -56 del AGTA               |
| E2C3                 | GCCTG -24 del            |                               | -82 del AATTT              |
| E4A6                 | GAAG T -101 del          |                               | -64 del GCAAG              |

Figure S5, con't.

C) *Lig3<sup>KO/KO</sup>; MtLig1 GFP*

| Translocation clones | Chr. 6                           |                         | Chr. 11                            |     |
|----------------------|----------------------------------|-------------------------|------------------------------------|-----|
|                      | CAGAA <u>GACTCCCGCCCA</u> TCTTC  | Translocation junctions | (G)CTCGCGGATACGGGGGGAGAGAGC        |     |
| E2E1                 | CAGAA <u>GACTCCCGCCCA</u> TCTTC  | TCT                     | TCG <u>CCGGATACGGGGGGAGAGAGC</u>   |     |
| E1C12                | CAGAA <u>GACTCCCGCCCA</u> TCTTC  |                         | GCTCG <u>CCGGATACGGGGGGAGAGAGC</u> |     |
| E1bG10               | CAGAA <u>GACTCCCGCCCA</u> TCTTC  |                         | CG <u>CCGGATACGGGGGGAGAGAGC</u>    |     |
| E1F1                 | CAGAA <u>GACTCCCGCCCA</u> TCTTC  |                         | G <u>CCGGATACGGGGGGAGAGAGC</u>     |     |
| E1D4                 | CAGAA <u>GACTCCCGCCCA</u> TCTTC  |                         | G <u>CCGGATACGGGGGGAGAGAGC</u>     |     |
| E1A10                | CAGAA <u>GACTCCCGCCCA</u> T      |                         | GCTCG <u>CCGGATACGGGGGGAGAGAGC</u> |     |
| E2G8                 | CAGAA <u>GACTCCCGCCCA</u> T      |                         | GCTCG <u>CCGGATACGGGGGGAGAGAGC</u> |     |
| E1bE5                | CAGAA <u>GACTCCCGCCCA</u> TCTTC  |                         | CGGATACGGGGGGAGAGAGC               |     |
| E2A10                | CAGAA <u>GACTCCCGCCCA</u> TCT    |                         | CG <u>CCGGATACGGGGGGAGAGAGC</u>    |     |
| E1E7                 | CAGAA <u>GACTCCCGCCCA</u> TCT    |                         | CG <u>CCGGATACGGGGGGAGAGAGC</u>    |     |
| E2bF9                | CAGAA <u>GACTCCCGCCCA</u> TCT    |                         | CG <u>CCGGATACGGGGGGAGAGAGC</u>    |     |
| E2bC4                | CAGAA <u>GACTCCCGCCCA</u> TCT    |                         | G <u>CCGGATACGGGGGGAGAGAGC</u>     |     |
| E2bE12               | CAGAA <u>GACTCCCGCC</u>          |                         | TCG <u>CCGGATACGGGGGGAGAGAGC</u>   |     |
| E2H10                | CAGAA <u>GACTCCCGCC</u>          |                         | TCG <u>CCGGATACGGGGGGAGAGAGC</u>   |     |
| E2H5                 | CAGAA <u>GACTCCCGCCCA</u>        | AGACAT                  | CCGATACGGGGGGAGAGAGC               |     |
| E1F4                 | CAGAA <u>GACTCCCGCCC</u>         |                         | CCGATACGGGGGGAGAGAGC               |     |
| E2bD2                | CAGAA <u>GACTCCCGCCCA</u> T      |                         | ATACGGGGGGAGAGAGC                  |     |
| E1A3                 | CAGAA <u>GACTCCCGCCCA</u> TCT    |                         | ACGGGGGGAGAGAGC                    |     |
| E1D9                 | CAGAA <u>GACTCCCGCCC</u>         |                         | GGATACGGGGGGAGAGAGC                |     |
| E2bH3                | CAGAA <u>GACTCCCGCCC</u>         |                         | GGATACGGGGGGAGAGAGC                |     |
| E1A1                 | CAGAA <u>GACTCCCGCCCA</u> T      |                         | GGGGGGAGAGAGC                      |     |
| E1H12                | CAGAA <u>GACTCCCGCCCA</u> T      |                         | ACGGGGGGAGAGAGC                    |     |
| E1A6                 | CAGAA <u>GACTCCCGCC</u>          |                         | GGATACGGGGGGAGAGAGC                |     |
| E2C4                 | CAGAA <u>GACTCCCGCCCA</u> TCTTCT |                         | GGGAGAGAGC                         |     |
| E1F9                 | CAGAA <u>GACTCCCGCC</u>          |                         | GATACGGGGGGAGAGAGC                 |     |
| E2bA12               | CAGAA <u>GACTCCCGCCCA</u>        |                         | CGGGGGAGAGAGC                      |     |
| E1C9                 | CAGAA <u>GACTCCCG</u>            |                         | GATACGGGGGGAGAGAGC                 |     |
| E1C10                | CAGAA <u>GACTCCCG</u>            |                         | GATACGGGGGGAGAGAGC                 |     |
| E2B8                 | CAGAA <u>GACTCCCGC</u>           |                         | GGGGGAGAGAGC                       |     |
| E1E11                | CAGAA <u>GACTCCCG</u>            |                         | ATACGGGGGGAGAGAGC                  |     |
| E1G10                | CAGAA <u>GACTCCCGCCCA</u>        |                         | GGGGGAGAGAGC                       |     |
| E1H8                 | CAGAA <u>GACTCCCGCCC</u>         |                         | GGGGGGAGAGAGC                      |     |
| E1D3                 | CAGAA <u>GACTCCCGCCCA</u> TCTTC  | GC                      | GAGAGC                             |     |
| E2bB12               | CAGAA <u>GAC</u>                 |                         | GGATACGGGGGGAGAGAGC                |     |
| E1C11                | CAGAA <u>GACTCCCGCCCA</u> TCTTCT | G                       | GAGC                               |     |
| E1F2                 | CAGAA <u>GA</u>                  |                         | TACGGGGGGAGAGAGC                   |     |
| E1H1                 | CCC                              |                         | GGATACGGGGGGAGAGAGC                |     |
| E1E3                 | CAGAA <u>GAC</u>                 |                         | GGGGGAGAGAGC                       |     |
| E1bF2                | CAGAA                            |                         | TACGGGGGGAGAGAGC                   |     |
| E1G4                 | CAGAA <u>GACTCCCG</u>            |                         | AGAGC                              |     |
| E2G6                 | CAGAA <u>GACTCCCGCCC</u>         |                         | -26del                             | TTA |
| E1G2                 | CAGAA <u>GA</u>                  |                         | GAGAGAGC                           |     |
| E1G5                 | CAGAA <u>GACTC</u>               | AAG                     | AGAGC                              |     |
| E2E11                | CTG -26del                       | GAACTTC                 | ATACGGGGGGAGAGAGC                  |     |
| E2bF11               | CCT -27del                       | +160 inser.             | CGGGGGAGAGAGC                      |     |
| E2bC1                | CAGAA <u>G</u>                   |                         | -26del                             | TTA |
| E2G7                 | CAGAA                            |                         | CTT                                |     |
| E1H6                 | CAGAA <u>GACTCCCGCCCA</u> T      |                         | -81del                             | AAA |
| E1H11                | TTA -33del                       | +29 inser.              | -56del                             | TGT |
| E1bE6                | TCT -111del                      | +36 inser.              | GCCGGATACGGGGGGAGAGAGC             |     |

Figure S5, con't.

D) *Lig3<sup>KO/KO</sup>*; *MtLig1 ΔNLS GFP*

| Translocation clones | Chr. 6                   |                 | Chr. 11                        |
|----------------------|--------------------------|-----------------|--------------------------------|
|                      | CAGAA GACTCCCGCCCA TCTTC |                 | (G) CTCGCCGGATACGGGG GGAGAGAGC |
| E1E1                 | CAGAA GACTCCCGCCCA TCTTC |                 | GCTCG CCGGATACGGGG GGAGAGAGC   |
| E1H12                | CAGAA GACTCCCGCCCA TCTT  |                 | TCG CCGGATACGGGG GGAGAGAGC     |
| E2E9                 | CAGAA GACTCCCGCCCA TCT   |                 | CG CCGGATACGGGG GGAGAGAGC      |
| E1B2                 | CAGAA GACTCCCGCCCA TCT   |                 | TCG CCGGATACGGGG GGAGAGAGC     |
| E2A2                 | CAGAA GACTCCCGCCCA TCT   |                 | TCG CCGGATACGGGG GGAGAGAGC     |
| E1F9                 | CAGAA GACTCCCGCCCA T     | T               | GCTCG CCGGATACGGGG GGAGAGAGC   |
| E1G5                 | CAGAA GACTCCCGCCCA TCT   |                 | CG CCGGATACGGGG GGAGAGAGC      |
| E2C10                | CAGAA GACTCCCGCCCA T     |                 | GCTCG CCGGATACGGGG GGAGAGAGC   |
| E2A10                | CAGAA GACTCCCGCCCA       |                 | CG CCGGATACGGGG GGAGAGAGC      |
| E2B8                 | CAGAA GACTCCCGCCCA TC    |                 | GCCGGATACGGGG GGAGAGAGC        |
| E2G8                 | CAGAA GACTCCCGCCCA TCT   |                 | GGATACGGGG GGAGAGAGC           |
| E2B10                | CAGAA GACTCCCGCCCA TC    |                 | CGGATACGGGG GGAGAGAGC          |
| E2B8                 | CAGAA GACTCCCGCCCA TC    |                 | CGGATACGGGG GGAGAGAGC          |
| E2C1                 | CAGAA GACTCCCGCCCA TC    |                 | CGGATACGGGG GGAGAGAGC          |
| E2B12                | CAGAA GACTCCCGCC         |                 | GCCGGATACGGGG GGAGAGAGC        |
| E1D12                | CAGAA GACTCCCGCCCA       |                 | GATACGGGG GGAGAGAGC            |
| E1G11                | CAGAA GACTCCCGCCCA TC    |                 | GGATACGGGG GGAGAGAGC           |
| E2A4                 | CAGAA GACTCCCGCCCA TC    |                 | GGATACGGGG GGAGAGAGC           |
| E1G9                 | CAGAA GACTCCCGCC         |                 | GGATACGGGG GGAGAGAGC           |
| E2D6                 | CAGAA GACTCC CGCC        |                 | GGATACGGGG GGAGAGAGC           |
| E2D1                 | CAGAA GACT               | TTC             | GCTCG CCGGATACGGGG GGAGAGAGC   |
| E2H6                 | CAGAA GACTCCCG           | TAT             | CCGGATACGGGG GGAGAGAGC         |
| E3C2                 | CAGAA GACTCCCGCC         |                 | GGATACGGGG GGAGAGAGC           |
| E2B7                 | CAGAA GACTCCCGCCCA       |                 | CGGGG GGAGAGAGC                |
| E1H4                 | CAGAA GACTCCCGC          |                 | ATACGGGG GGAGAGAGC             |
| E2B5                 | CAGAA G                  |                 | CTCG CCGGATACGGGG GGAGAGAGC    |
| E3C7                 | CAGAA GACTC CCG          |                 | GATACGGGG GGAGAGAGC            |
| E1D5                 | CAGAA GACTCCCGCCC        | GT              | ACGGGG GGAGAGAGC               |
| E2B11                | CAGAA GACTC              |                 | GGGG GGAGAGAGC                 |
| E1A5                 | CAGAA                    |                 | CCGGATACGGGG GGAGAGAGC         |
| E1C8                 | CAGAA GACTCCCGCCC        |                 | GGGAGAGAGC                     |
| E1D7                 | CAGAA GACTCCCGCCCATC     | CAGTTCAGACCT    | AGAGAGC                        |
| E2D12                | CAGAA GACTCC             |                 | GGGG GGAGAGAGC                 |
| E2C3                 | CAGAA GACT               |                 | ACGGGG GGAGAGAGC               |
| E3B5                 | CAGAA GACTCCCGCCCA       |                 | AGC                            |
| E2H3                 | CAGAA GAC                |                 | GGGG GGAGAGAGC                 |
| E2E5                 | CAG                      |                 | GAGAGAGC                       |
| E1B11                | CAGAA GACTCCCG           | TATA            | C                              |
| E2A8                 | CAGAA GACTCCCGC          | AT              | -35 del GCG                    |
| E1A8                 | C                        |                 | GC                             |
| E1A11                | CTGCC -22 del            | GGGGGGAGGCAGGGC | AGC                            |
| E3D3                 | GCAGG -60 del            |                 | ATACGGGG GGAGAGAGC             |
| E2B1                 | CACCA -42 del            |                 | -44 del TATGG                  |
| E1C7                 | CAGAA GACTCCCG           |                 | -89 del GTTT                   |
| E2G9                 | TGGAA -92 del            |                 | CGGGG GGAGAGAGC                |
| E2H10                | CGTTA -37 del            |                 | -69 del AGTAA                  |
| E1B1                 | CAGAA GACTC              | +174 bp         | -163 del AATGC                 |

Figure S5, con't.

E) *Lig3<sup>KO/KO</sup>*; *Lig3 GFP*

| Translocation clones | Chr. 6                   |                                 | Chr. 11                      |
|----------------------|--------------------------|---------------------------------|------------------------------|
|                      | CAGAA GACTCCCGCCCA TCTTC | (G) CTCG CCGGATACGGGG GGAGAGAGC |                              |
| E2D10                | CAGAA GACTCCCGCCCA TCTTC |                                 | GCTCG CCGGATACGGGG GGAGAGAGC |
| E3F3                 | CAGAA GACTCCCGCCCA TCTTC |                                 | GCTCG CCGGATACGGGG GGAGAGAGC |
| E4F5                 | CAGAA GACTCCCGCCCA TCTTC |                                 | CTCG CCGGATACGGGG GGAGAGAGC  |
| E3D11                | CAGAA GACTCCCGCCCA TCTTC |                                 | TCG CCGGATACGGGG GGAGAGAGC   |
| E4B2                 | CAGAA GACTCCCGCCCA TCTTC |                                 | TCG CCGGATACGGGG GGAGAGAGC   |
| E4G6                 | CAGAA GACTCCCGCCCA TCT   |                                 | CTCG CCGGATACGGGG GGAGAGAGC  |
| E5E4                 | CAGAA GACTCCCGCCCA TCT   | CC                              | CTCG CCGGATACGGGG GGAGAGAGC  |
| E2C9                 | CAGAA GACTCCCGCCCA TCTTC |                                 | GCCGGATACGGGG GGAGAGAGC      |
| E4B4                 | CAGAA GACTCCCGCCCA TCTTC |                                 | GCCGGATACGGGG GGAGAGAGC      |
| E5G11                | CAGAA GACTCCCGCCCA TCTTC |                                 | GCCGGATACGGGG GGAGAGAGC      |
| E4G12                | CAGAA GACTCCCGCCCA TCT   |                                 | CGCCGGATACGGGG GGAGAGAGC     |
| E5G12                | CAGAA GACTCCCGCCCA T     |                                 | TCG CCGGATACGGGG GGAGAGAGC   |
| E4H3                 | CAGAA GACTCCCGCCCA T     |                                 | CGCCGGATACGGGG GGAGAGAGC     |
| E4F2                 | CAGAA GACTCCCGCCCA TC    | G                               | GCCGGATACGGGG GGAGAGAGC      |
| E3C2                 | CAGAA GACTCCCGCC C       |                                 | TCG CCGGATACGGGG GGAGAGAGC   |
| E3H7                 | CAGAA GACTCCCGCC C       |                                 | TCG CCGGATACGGGG GGAGAGAGC   |
| E5C10                | CAGAA GACTCCCGCCCA       | AAGACAT                         | CCGGATACGGGG GGAGAGAGC       |
| E4E8                 | CAGAA GACTCCCGCCCA       | A                               | CCGGATACGGGG GGAGAGAGC       |
| E2F12                | CAGAA GACTCCCGCCCA       |                                 | CGGATACGGGG GGAGAGAGC        |
| E2E8                 | CAGAA GACTCCCGCC C       | +21bp                           | CGGATACGGGG GGAGAGAGC        |
| E2G8                 | CAGAA GACTCCCGCCCA TCT   | CGGCCGGG                        | TACGGGG GGAGAGAGC            |
| E4A5                 | CAGAA GACTCCCGCC C       | TGTCAGTTAA                      | CGGATACGGGG GGAGAGAGC        |
| E5B11                | CAGAA GACT C             |                                 | TCG CCGGATACGGGG GGAGAGAGC   |
| E2E1                 | CAGAA GACTCC CGCC        |                                 | GGATACGGGG GGAGAGAGC         |
| E3F2                 | CAGAA GACTCC CGCC        |                                 | GGATACGGGG GGAGAGAGC         |
| E3F4                 | CAGAA GACTCC CGCC        |                                 | GGATACGGGG GGAGAGAGC         |
| E3G11                | CAGAA GACTCC CGCC        |                                 | GGATACGGGG GGAGAGAGC         |
| E3B12                | CAGAA GACTCC CGCC        |                                 | GGATACGGGG GGAGAGAGC         |
| E4B8                 | CAGAA GACTCC CGCC        |                                 | GGATACGGGG GGAGAGAGC         |
| E5H2                 | CAGAA GACTCC CGCC        |                                 | GGATACGGGG GGAGAGAGC         |
| E5B7                 | CAGAA GACTCC CGCC        |                                 | GGATACGGGG GGAGAGAGC         |
| E4B10                | CAGAA GACTCCCGCCCA TCT   |                                 | GGGG GGAGAGAGC               |
| E2F6                 | CAGAA GACTCCCG           |                                 | GGG GGAGAGAGC                |
| E3C5                 | CAGAA GACTCCC            | T                               | CCGGATACGGGG GGAGAGAGC       |
| E2C6                 | CAGAA GACTCCCGCC         |                                 | ATACGGGG GGAGAGAGC           |
| E4E11                | CAGAA GACTCC             |                                 | CGGATACGGGG GGAGAGAGC        |
| E5A9                 | CAGAA GACTCCCGC          | A                               | GATACGGGG GGAGAGAGC          |
| E4E7                 | CAGAA GACTCC C           |                                 | GGATACGGGG GGAGAGAGC         |
| E2E11                | CAGAA GACTCCCG           |                                 | GATACGGGG GGAGAGAGC          |
| E5F9                 | CAGAA GACTCCCG           |                                 | GATACGGGG GGAGAGAGC          |
| E2A7                 | CAGAA GACTCCCG           |                                 | GATACGGGG GGAGAGAGC          |
| E4D2                 | CAGAA GACTCCCGCCC        | CGG                             | GGGG GGAGAGAGC               |
| E3F5                 | CAGAA GACT               |                                 | GGATACGGGG GGAGAGAGC         |
| E3A12                | CAGAA G                  |                                 | CCGGATACGGGG GGAGAGAGC       |
| E3H12                | CAGAA GA                 | TAC                             | GGATACGGGG GGAGAGAGC         |
| E5E9                 | CAGAA                    | AACTC                           | CCGGATACGGGG GGAGAGAGC       |
| E2D9                 | CAGAA GACTCCC            | TCGGATCA                        | GGGG GGAGAGAGC               |
| E5D3                 | CAGAA GACTCCCG           |                                 | GGGAGAGAGC                   |

Figure S5, con't.

E) *Lig3<sup>KO/KO</sup>*; *Lig3 GFP*

| Translocation clones | Chr. 6                   | Translocation junctions        |  | Chr. 11              |
|----------------------|--------------------------|--------------------------------|--|----------------------|
|                      | CAGAA GACTCCCGCCCA TCTTC | (G) CTCGCCGGATACGGGGG GAGAGAGC |  |                      |
| E2B2                 | CAGAA <u>GA</u>          |                                |  | TACGGGGG GAGAGAGC    |
| E4F7                 | CAGAA <u>GA</u>          |                                |  | TACGGGGG GAGAGAGC    |
| E4C12                | CAGAA <u>GA</u>          |                                |  | TACGGGGG GAGAGAGC    |
| E2C10                | CAGAA <u>G</u>           |                                |  | TACGGGGG GAGAGAGC    |
| E2A12                | CAGAA <u>GACT</u>        | G                              |  | CGGGGG GAGAGAGC      |
| E3D6                 | C <u>AG</u>              |                                |  | GATACGGGGG GAGAGAGC  |
| E5A12                | CAGAA <u>GAC</u>         |                                |  | GGGGGG GAGAGAGC      |
| E5E11                | CAGAA GACTCCCGCCCAT      |                                |  | -25 del TTAAG        |
| E5G8                 | C <u>AGA</u>             |                                |  | TACGGGGG GAGAGAGC    |
| E3H5                 | <u>TGCC</u> -22del       |                                |  | GGATACGGGGG GAGAGAGC |
| E2C7                 | CAGAA <u>GA</u>          | A                              |  | GGGGGAGAGAGC         |
| E3D1                 | CAGAA GACTCCCGCCC        | +265bp                         |  | AGC                  |
| E5B2                 | CAGAA <u>GA</u>          | TACA                           |  | GGGGGAGAGAGC         |
| E4C3                 | CAGAA GACTCCCGCCCAT      | G                              |  | -28 del AGTTG        |
| E4G11                | <u>CCTG</u> -24del       |                                |  | GGGGGAGAGAGC         |
| E4A4                 | CAGAA <u>GACT</u>        |                                |  | -26 del TAAGT        |
| E3B10                | CAGAA                    |                                |  | -27 del AAGTT        |
| E5B4                 | CAGAA <u>G</u>           |                                |  | -30 del TTGA         |
| E3H9                 | CAGAA <u>G</u>           |                                |  | -37 del CGGTT        |
| E2H1                 | <u>TTAAG</u> -29 del     |                                |  | -30 del TTGAA        |
| E4H1                 | <u>TAGC</u> -35 del      |                                |  | -25 del TTAAG        |
| E4H4                 | <u>TAGC</u> -35 del      |                                |  | -25 del TTAAG        |
| E3G1                 | <u>GTTA</u> -37 del      |                                |  | -28 del AGTTG        |
| E2G10                | <u>CCGG</u> -68 del      |                                |  | GGGGGAGAGAGC         |
| E4F4                 | CAGAA GACTCCCG           |                                |  | -140 del TCATT       |
| E5A3                 | <u>ACCT</u> -78 del      |                                |  | -84 del TTGGT        |

Figure S5, con't.

F) *Lig3<sup>KO/KO</sup>*; *Lig3 ΔZnF GFP*

| Translocation clones | Chr. 6                          | Translocation junctions | Chr. 11                                |
|----------------------|---------------------------------|-------------------------|----------------------------------------|
|                      | CAGAA <u>GACTCCCGCCCA</u> TCTTC |                         | (G) CTCG <u>CCGGATACGGGG</u> GGAGAGAGC |
| E4D6                 | CAGAA <u>GACTCCCGCCCA</u> TCTTC |                         | TCG <u>CCGGATACGGGG</u> GGAGAGAGC      |
| E4H4                 | CAGAA <u>GACTCCCGCCCA</u> TCTTC |                         | G <u>CCGGATACGGGG</u> GGAGAGAGC        |
| E7D11                | CAGAA <u>GACTCCCGCCCA</u> TCTTC |                         | G <u>CCGGATACGGGG</u> GGAGAGAGC        |
| E5H2                 | CAGAA <u>GACTCCCGCCCA</u> TCTTC | +30 bp                  | G <u>CCGGATACGGGG</u> GGAGAGAGC        |
| E4C5                 | CAGAA <u>GACTCCCGCC</u>         |                         | TCG <u>CCGGATACGGGG</u> GGAGAGAGC      |
| E1A5                 | CAGAA <u>GACTCCCGCCCA</u> TCT   |                         | CG <u>CCGGATACGGGG</u> GGAGAGAGC       |
| E2G2                 | CAGAA <u>GACTCCCGCCCA</u> TCT   |                         | CG <u>CCGGATACGGGG</u> GGAGAGAGC       |
| E5E5                 | CAGAA <u>GACTCCCGCCCA</u> TCT   |                         | CG <u>CCGGATACGGGG</u> GGAGAGAGC       |
| E1C3                 | CAGAA <u>GACTCCCGCCCA</u> T     | G                       | GCTCG <u>CCGGATACGGGG</u> GGAGAGAGC    |
| E5A3                 | CAGAA <u>GACTCCCGCCCA</u> TC    |                         | G <u>CCGGATACGGGG</u> GGAGAGAGC        |
| E2G12                | CAGAA <u>GACTCCCGCCCA</u> TC    | CAGTT                   | G <u>CCGGATACGGGG</u> GGAGAGAGC        |
| E5C4                 | CAGAA <u>GACTCCCGCCCA</u> T     |                         | G <u>CCGGATACGGGG</u> GGAGAGAGC        |
| E4B1                 | CAGAA <u>GACTCCCGCCCA</u>       | +288 bp                 | CG <u>CCGGATACGGGG</u> GGAGAGAGC       |
| E3A6                 | CAGAA <u>GACTCCCGCCCA</u> TC    |                         | C <u>GGATACGGGG</u> GGAGAGAGC          |
| E1E6                 | CAGAA <u>GACTCCCGCCCA</u> TCT   | +25 bp                  | G <u>GATACGGGG</u> GGAGAGAGC           |
| E5F12                | CAGAA <u>GACTCCCGCCC</u>        | +300 bp                 | G <u>CCGGATACGGGG</u> GGAGAGAGC        |
| E7A6                 | CAGAA <u>GACTCCCGCCC</u>        |                         | C <u>CGGATACGGGG</u> GGAGAGAGC         |
| E2D7                 | CAGAA <u>GACTCCCGCCC</u>        |                         | C <u>GGATACGGGG</u> GGAGAGAGC          |
| E6C10                | CAGAA <u>GACTCCC</u>            |                         | TCG <u>CCGGATACGGGG</u> GGAGAGAGC      |
| E4G7                 | CAGAA <u>GACTCCC</u> G          |                         | C <u>CGGATACGGGG</u> GGAGAGAGC         |
| E1D8                 | CAGAA <u>GACTCCC</u> CGCC       |                         | G <u>GATACGGGG</u> GGAGAGAGC           |
| E1A9                 | CAGAA <u>GACTCCC</u> CGCC       |                         | G <u>GATACGGGG</u> GGAGAGAGC           |
| E2A4                 | CAGAA <u>GACTCCC</u> CGCC       |                         | G <u>GATACGGGG</u> GGAGAGAGC           |
| E3B9                 | CAGAA <u>GACTCCC</u> CGCC       |                         | G <u>GATACGGGG</u> GGAGAGAGC           |
| E5D2                 | CAGAA <u>GACTCCC</u> CGCC       |                         | G <u>GATACGGGG</u> GGAGAGAGC           |
| E6A1                 | CAGAA <u>GACTCCC</u> CGCC       |                         | G <u>GATACGGGG</u> GGAGAGAGC           |
| E7C4                 | CAGAA <u>GACTCCC</u> CGCC       |                         | G <u>GATACGGGG</u> GGAGAGAGC           |
| E2E2                 | CAGAA <u>GACTCCCGCCCA</u> T     | TG                      | G <u>GGGGGGAGAGAGC</u>                 |
| E7C10                | CAGAA <u>GACTCCCGCCCA</u> TCTTC |                         | G <u>GGGGGGAGAGAGC</u>                 |
| E6B11                | CAGAA <u>GACTCCCGC</u>          | +312 bp                 | G <u>GATACGGGG</u> GGAGAGAGC           |
| E6A3                 | CAGAA <u>GACTC</u>              |                         | G <u>CCGGATACGGGG</u> GGAGAGAGC        |
| E2B9                 | CAGAA <u>GACTCCCG</u>           |                         | G <u>GATACGGGG</u> GGAGAGAGC           |
| E5F10                | CAGAA <u>GACTCCCG</u>           |                         | G <u>GATACGGGG</u> GGAGAGAGC           |
| E6A4                 | CAGAA <u>GACTCCCG</u>           |                         | G <u>GATACGGGG</u> GGAGAGAGC           |
| E7A4                 | CAGAA <u>GACTCCCG</u>           |                         | G <u>GATACGGGG</u> GGAGAGAGC           |
| E6A11                | CAGAA <u>GACTCC</u>             |                         | G <u>GATACGGGG</u> GGAGAGAGC           |
| E6D1                 | CAGAA <u>GACT</u>               | +261 bp                 | C <u>CGGATACGGGG</u> GGAGAGAGC         |
| E7F7                 | CAGAA <u>GACTCCCGCCCA</u> T     |                         | G <u>GGGAGAGAGC</u>                    |
| E3B5                 | CAGAA <u>G</u>                  | +260 bp                 | C <u>CGGATACGGGG</u> GGAGAGAGC         |
| E4C8                 | CAGAA <u>GACTCCC</u> G          |                         | G <u>GGGGAGAGAGC</u>                   |
| E3D9                 | CAGAA <u>GACTCCC</u> G          |                         | G <u>GGGGAGAGAGC</u>                   |
| E2C11                | CAGAA <u>G</u>                  |                         | C                                      |
| E4G9                 | CAGAA <u>GACTCCC</u>            |                         | A <u>TACGGGG</u> GGAGAGAGC             |
| E3D7                 | CAGAA <u>GACTCCCGCCCA</u> A     |                         | GAGC                                   |
| E2G7                 | CAGAA <u>GACTC</u>              | +23 bp                  | GAGAGAGC                               |
| E7F5                 | CAGAA <u>GA</u>                 |                         | GAGC                                   |



Figure S5, con't.

F) *Lig3*<sup>KO/KO</sup>; *Lig3* ΔZnF GFP

| Translocation clones | Chr. 6                    |              | Chr. 11 |                       |
|----------------------|---------------------------|--------------|---------|-----------------------|
|                      | CAGAA                     | GACTCCCGCCCA | (G)CTCG | CCGGATACGGGGGGAGAGAGC |
| E6E1                 | CAGA                      |              |         | GGAGAGAGC             |
| E3H10                | CAGAA <u>GA</u>           |              |         | GAGC                  |
| E4F12                | <u>CAGA</u>               |              |         | GAGAGC                |
| E7D4                 | AGCCT -25 del             |              | TTTTCA  | GAGAGAGC              |
| E2H11                | <u>CAGAA</u> G            |              |         | -37 del CGGGT         |
| E7B12                | <u>CAGAA</u> G            |              |         | -37 del CGGT          |
| E2H12                | CAGAA <u>GACTCCCGCCCA</u> | +75 bp       |         | -66 del GTAA          |
| E6D12                | <u>TAGC</u> -35 del       |              |         | -38 del GGTT          |
| E7B2                 | CCAGG -39 del             |              |         | -47 del CATT          |
| E1H7                 | TCCAA -88 del             |              |         | GATACGGGGGGAGAGAGC    |
| E1B8                 | <u>ACCG</u> -118 del      |              |         | GATACGGGGGGAGAGAGC    |
| E3C3                 | CAGAA <u>GACTCCCGC</u>    | +152 bp      |         | -132 del ACTT         |
| E7B8                 | CCCAT -158 del            | +142 bp      |         | GGGGAGAGAGC           |
| E3B12                | <u>CAG</u>                |              |         | -199 del TGATC        |

Figure S5, con't.

G) *Lig3<sup>KO/KO</sup>; Lig3 ΔBRCT GFP*

| Translocation clones | Chr. 6                   |                               | Chr. 11                     |
|----------------------|--------------------------|-------------------------------|-----------------------------|
|                      | CAGAA GACTCCCGCCCA TCTTC | (G) CTCGCCGATACGGGG GGAGAGAGC |                             |
| E3C5                 | CAGAA GACTCCCGCCCA TCTTC |                               | CTCGCCGGATACGGGG GGAGAGAGC  |
| E1E3                 | CAGAA GACTCCCGCCCA TCTTC |                               | TCGCCGGATACGGGG GGAGAGAGC   |
| E2B7                 | CAGAA GACTCCCGCCCA TCTTC |                               | TCGCCGGATACGGGG GGAGAGAGC   |
| E2G10                | CAGAA GACTCCCGCCCA TCTTC |                               | GCCGGATACGGGG GGAGAGAGC     |
| E3A2                 | CAGAA GACTCCCGCCCA TCTTC |                               | GCCGGATACGGGG GGAGAGAGC     |
| E1A1                 | CAGAA GACTCCCGCCCA TC    |                               | GCTCGCCGGATACGGGG GGAGAGAGC |
| E3C4                 | CAGAA GACTCCCGCCCA TC    | GC                            | GCTCGCCGGATACGGGG GGAGAGAGC |
| E1E2                 | CAGAA GACTCCCGCCCA TCT   |                               | CGCCGGATACGGGG GGAGAGAGC    |
| E2D4                 | CAGAA GACTCCCGCCCA T     | A                             | GCTCGCCGGATACGGGG GGAGAGAGC |
| E3D1                 | CAGAA GACTCCCGCCCA T     |                               | GCTCGCCGGATACGGGG GGAGAGAGC |
| E1C2                 | CAGAA GACTCCCGCCCA TCT   |                               | GCCGGATACGGGG GGAGAGAGC     |
| E3F1                 | CAGAA GACTCCCGCCCA TCTTC |                               | CGGATACGGGG GGAGAGAGC       |
| E2F8                 | CAGAA GACTCCCGCCCA TC    |                               | GCCGGATACGGGG GGAGAGAGC     |
| E3C3                 | CAGAA GACTCCCGCCCA TC    |                               | GCCGGATACGGGG GGAGAGAGC     |
| E1D1                 | CAGAA GACTCCCGCCC        | +28 bp                        | CGCCGGATACGGGG GGAGAGAGC    |
| E3B6                 | CAGAA GACTCCCGCCCA TC    |                               | GGATACGGGG GGAGAGAGC        |
| E3F6                 | CAGAA GACTCCCGCCCA       |                               | CGGATACGGGG GGAGAGAGC       |
| E1F6                 | CAGAA GACTCCCGCCCA TCTTC |                               | ACGGGG GGAGAGAGC            |
| E3B2                 | CAGAA GACTCCCGCCCA TCTT  | GCCGGG                        | TACGGGG GGAGAGAGC           |
| E1F3                 | CAGAA GACTCCCGCCCA TCTTC |                               | GGGG GGAGAGAGC              |
| E1H12                | CAGAA GACTCCCGCCC        |                               | GGATACGGGG GGAGAGAGC        |
| E3F7                 | CAGAA GACTCCCGCCCA       |                               | ATACGGGG GGAGAGAGC          |
| E1D4                 | CAGAA GACTCCCGCC         |                               | GGATACGGGG GGAGAGAGC        |
| E1E9                 | CAGAA GACTCCCGCC         |                               | GGATACGGGG GGAGAGAGC        |
| E2F2                 | CAGAA GACTCCCGCC         |                               | GGATACGGGG GGAGAGAGC        |
| E2G5                 | CAGAA GACTCCCGCC         |                               | GGATACGGGG GGAGAGAGC        |
| E3C1                 | CAGAA GACTCCCGCC         |                               | GGATACGGGG GGAGAGAGC        |
| E3F11                | CAGAA GACTCCCGCC         |                               | GGATACGGGG GGAGAGAGC        |
| E2C1                 | CAGAA GACTCCCG           | TAT                           | CCGGATACGGGG GGAGAGAGC      |
| E2A12                | CAGAA GACTCCC            | C                             | CCGGATACGGGG GGAGAGAGC      |
| E3G12                | CAGAA GACTCCCG           |                               | GGATACGGGG GGAGAGAGC        |
| E1B7                 | CAGAA GACTCCCG           |                               | GATACGGGG GGAGAGAGC         |
| E1H9                 | CAGAA GACTCCCG           |                               | GATACGGGG GGAGAGAGC         |
| E2C5                 | CAGAA GACTCCCG           |                               | GATACGGGG GGAGAGAGC         |
| E2D11                | CAGAA GACTCCCG           |                               | GATACGGGG GGAGAGAGC         |
| E3E4                 | CAGAA GACTCCCG           |                               | GATACGGGG GGAGAGAGC         |
| E3F8                 | CAGAA GACTCC             | +381 bp                       | GATACGGGG GGAGAGAGC         |
| E2B2                 | CAGAA GACTCCCGCC         |                               | GGGG GGAGAGAGC              |
| E2A9                 | CAGAA GACTCCCGCC         |                               | GGGG GGAGAGAGC              |
| E1H3                 | CAGAA GACTCCCGC          |                               | GGGG GGAGAGAGC              |
| E2D12                | CAGAA GACTCCC            |                               | GGGG GGAGAGAGC              |
| E1E6                 | CAGAA GAC                |                               | GGGG GGAGAGAGC              |
| E2H5                 | CAGAA GAC                |                               | GGGG GGAGAGAGC              |
| E3B3                 | CAG                      |                               | GGGAGAGAGC                  |
| E1C9                 | GCCT -25 del             |                               | GGGG GGAGAGAGC              |
| E1A4                 | CAGA                     |                               | GAGAGC                      |
| E2H2                 | GCCT -25 del             | +33 bp                        | GGGG GGAGAGAGC              |
| E1H10                | CTGC -23 del             |                               | -25 del TTAAG               |
| E3H12                | CAG                      |                               | -30 del TTGAA               |

Figure S5, con't.

G) *Lig3*<sup>KO/KO</sup>; *Lig3* Δ*BRCT* GFP

Chr. 6

CAGAA GACTCCCGCCCA TCTTC

Chr. 11

CTCGCCGGATACGGGGGGAGAGAGC

Translocation

Translocation junctions

clones

E1C6 GTTAG -36 del  
E2A3 GCCTT -24 del  
E3A9 CAGAAG  
E2H6 TAGC -35 del  
E1A12 TTTAAG -30 del  
E1A5 GGTTA -37 del  
E3D6 GCCTT -32 del

GGGGAGAGAGC  
-27 del AAGTT  
-36 del CGGT  
-25 del TTAAC  
-30 del TTGAA  
-28 del AGTTC  
-54 del TGTAG

+39bp

Figure S5, con't.

H) Xrcc4-/-

| Translocation clones | Chr. 6                   |         | Chr. 11                       |
|----------------------|--------------------------|---------|-------------------------------|
|                      | CAGAA GACTCCCGCCCA TCTTC |         | (G) CTCGCCGGATACGGGGGGAGAGAGC |
| E2F9                 | CAGAA GACTCCCGCCCA TCTTC |         | CTCGCCGGATACGGGGGGAGAGAGC     |
| E1C6                 | CAGAA GACTCCCGCCCA TCTTC |         | GCCGGATACGGGGGGAGAGAGC        |
| E2A1                 | CAGAA GACTCCCGCCCA TCTTC |         | GCCGGATACGGGGGGAGAGAGC        |
| E2B8                 | CAGAA GACTCCCGCCCA TCTTC |         | GCCGGATACGGGGGGAGAGAGC        |
| E2G5                 | CAGAA GACTCCCGCCCA TCT   |         | CGCCGGATACGGGGGGAGAGAGC       |
| E2C10                | CAGAA GACTCCCGCCCA TCT   |         | CGCCGGATACGGGGGGAGAGAGC       |
| E2D5                 | CAGAA GACTCCCGCCCA T     |         | GCTCGCCGGATACGGGGGGAGAGAGC    |
| E1G10                | CAGAA GACTCCCGCCCA TCT   |         | CGCCGGATACGGGGGGAGAGAGC       |
| E2F1                 | CAGAA GACTCCCGCC         | C       | GCTCGCCGGATACGGGGGGAGAGAGC    |
| E2C8                 | CAGAA GACTCCCGCC         |         | GCTCGCCGGATACGGGGGGAGAGAGC    |
| E2E10                | CAGAA GACTCCCGCCCA TCT   |         | GGATACGGGGGGAGAGAGC           |
| E1F6                 | CAGAA GACTCCCGCCCA TC    |         | CGGATACGGGGGGAGAGAGC          |
| E1F7                 | CAGAA GACTCCCG           |         | GATACGGGGGGAGAGAGC            |
| E1A12                | CAGAA GACTCCCGCC         |         | CCGGATACGGGGGGAGAGAGC         |
| E2F3                 | CAGAA GACTCCCGCCCA T     |         | GGATACGGGGGGAGAGAGC           |
| E1D4                 | CAGAA GACTCCCGCCCA T     | TAT     | GGATACGGGGGGAGAGAGC           |
| E1A5                 | CAGAA GACTCCCGCC         | GTGATCT | GCCGGATACGGGGGGAGAGAGC        |
| E2C2                 | CAGAA GACTCCCGCC         | GTGATCT | GCCGGATACGGGGGGAGAGAGC        |
| E1F8                 | CAGAA GACTCCCGCC         |         | CGGATACGGGGGGAGAGAGC          |
| E2E1                 | CAGAA GACTCCCGCC         |         | CGGATACGGGGGGAGAGAGC          |
| E2D6                 | CAGAA GACTCCCGCCCA TCT   |         | ACGGGGGGAGAGAGC               |
| E1B2                 | CAGAA GACTCCCGCCCA TC    |         | TACGGGGGGAGAGAGC              |
| E1B5                 | CAGAA GACTCCCGCCCA       |         | GATACGGGGGGAGAGAGC            |
| E1G12                | CAGAA GACTCCCGCCCA TCTTC |         | GGGGGGAGAGAGC                 |
| E1A2                 | CAGAA GACTCCCGCC         |         | GGATACGGGGGGAGAGAGC           |
| E1E7                 | CAGAA GACTCCCGCC         |         | GGATACGGGGGGAGAGAGC           |
| E2E3                 | CAGAA GACTCCCGCC         |         | GGATACGGGGGGAGAGAGC           |
| E1F4                 | CAGAA GACTCCCGCC         | +355 bp | CGGATACGGGGGGAGAGAGC          |
| E2H7                 | CAGAA GACTCCCGCC         | +213 bp | CGGATACGGGGGGAGAGAGC          |
| E2B11                | CAGAA GACTCCCGCC         |         | GGATACGGGGGGAGAGAGC           |
| E1F1                 | CAGAA GACTCCCGCC         |         | GGATACGGGGGGAGAGAGC           |
| E1G1                 | CAGAA GACTCCCGCC         |         | GGATACGGGGGGAGAGAGC           |
| E1A6                 | CAGAA GACTCCCGCC         |         | GGATACGGGGGGAGAGAGC           |
| E1D12                | CAGAA GACTCCCGCC         |         | GGATACGGGGGGAGAGAGC           |
| E2F2                 | CAGAA GACTCCCGCC         |         | GGATACGGGGGGAGAGAGC           |
| E2A4                 | CAGAA GACTCCCGCC         |         | GGATACGGGGGGAGAGAGC           |
| E2A2                 | CAGAA GACTCCCGCCCA TC    |         | CGGGGGAGAGAGC                 |
| E1H5                 | CAGAA GACTCCCGCCCA T     |         | ACGGGGGGAGAGAGC               |
| E1A11                | CAGAA GACTCCCGC          | ACG     | GGATACGGGGGGAGAGAGC           |
| E2H1                 | CAGAA GACTCCCGC          | ATG     | GGATACGGGGGGAGAGAGC           |
| E2E9                 | CAGAA GACTCCCGC          | A       | GGATACGGGGGGAGAGAGC           |
| E1D3                 | CAGAA GACTCC             |         | CGGATACGGGGGGAGAGAGC          |
| E1H4                 | CAGAA GACTC              |         | GCCGGATACGGGGGGAGAGAGC        |
| E1A8                 | CAGAA GACTC              |         | GCCGGATACGGGGGGAGAGAGC        |
| E2G8                 | CAGAA GACTC              |         | GCCGGATACGGGGGGAGAGAGC        |
| E1A3                 | CAGAA GACTCCCG           |         | GATACGGGGGGAGAGAGC            |
| E1E8                 | CAGAA GACTCCCG           |         | GATACGGGGGGAGAGAGC            |
| E2C3                 | CAGAA GACTCCCG           |         | GATACGGGGGGAGAGAGC            |
| E2G6                 | CAGAA GACTCCCG           |         | GATACGGGGGGAGAGAGC            |

Figure S5, con't.

H) Xrcc4-/-

| Translocation clones | Chr. 6                          | Translocation junctions      |  | Chr. 11                   |
|----------------------|---------------------------------|------------------------------|--|---------------------------|
|                      | CAGAA <u>GACTCCCGCCCA</u> TCTTC | (G)CTCGCCGGATACGGGGGGAGAGAGC |  |                           |
| E1C4                 | CAGAA <u>GACTCCC</u>            | CCC                          |  | GGATACGGGGGGAGAGAGC       |
| E2E5                 | CAGAA <u>GACTCCC</u>            |                              |  | GATACGGGGGGAGAGAGC        |
| E1F12                | CAGAA <u>GAC</u>                |                              |  | GCCGGATACGGGGGGAGAGAGC    |
| E1A4                 | CAGAA <u>GACTC</u>              | CTGCCAGAAGACTC               |  | CGGATACGGGGGGAGAGAGC      |
| E1H11                | CAGAA <u>GACTCCCGCC</u>         | GGAGT                        |  | CGGGGGAGAGAGAGC           |
| E1C5                 | CAGAA <u>GACTC</u>              |                              |  | GATACGGGGGGAGAGAGC        |
| E2G4                 | CAGAA <u>GACTC</u>              |                              |  | GCCGGATACGGGGGGAGAGAGC    |
| E2G11                | CAGAA <u>GACTCCCGC</u>          |                              |  | GGGAGAGAGC                |
| E1H2                 | CAGAA <u>GAC</u>                | CCCG                         |  | GATACGGGGGGAGAGAGC        |
| E2G3                 | CAGAA <u>GACTCCCG</u>           |                              |  | GGGGGAGAGAGAGC            |
| E2B1                 | CAGAA <u>G</u>                  |                              |  | GATACGGGGGGAGAGAGC        |
| E1C10                | CAGAA <u>GACT</u>               |                              |  | ACGGGGGGAGAGAGAGC         |
| E2A8                 | CAGAA <u>GACTCCCGCCCA</u>       |                              |  | GC                        |
| E2H4                 | CAGAA                           |                              |  | GGGGGAGAGAGAGC            |
| E2H2                 | CA                              | CC                           |  | ACGGGGGGAGAGAGAGC         |
| E2D10                | <u>CAGA</u>                     |                              |  | GAGAGC                    |
| E2E7                 | <u>TAGCC</u> -31 del            |                              |  | GGATACGGGGGGAGAGAGAGC     |
| E2B12                | <u>TAGCC</u> -31 del            |                              |  | GGATACGGGGGGAGAGAGAGC     |
| E2D7                 | <u>CTTTA</u> -27 del            | GGATAC                       |  | GGGGGAGAGAGAGC            |
| E2A7                 | <u>CAG</u>                      |                              |  | GAGAGC                    |
| E1C9                 | <u>AGCCT</u> -33 del            | +29 bp                       |  | CGGATACGGGGGGAGAGAGAGC    |
| E1H12                | <u>CAG</u>                      |                              |  | AGAGC                     |
| E1D9                 | <u>CAGA</u>                     |                              |  | GAGC                      |
| E1H3                 | <u>CAGA</u>                     |                              |  | GC                        |
| E1B8                 | CAGAA <u>GACTCCCG</u>           | AG                           |  | -35 del GCGG <sup>†</sup> |
| E1C2                 | <u>CAGG</u> -40 del             |                              |  | ATACGGGGGGAGAGAGAGC       |
| E2A11                | <u>CACAC</u> -46 del            |                              |  | CGGATACGGGGGGAGAGAGAGC    |
| E1F3                 | <u>CAGAA</u> <u>G</u>           |                              |  | -37 del CGGT <sup>†</sup> |
| E2D8                 | <u>CAGAA</u> <u>G</u>           |                              |  | -37 del CGGG <sup>†</sup> |
| E2D12                | <u>CAGAA</u> <u>G</u>           |                              |  | -37 del CGGG <sup>†</sup> |
| E1B4                 | <u>TTAGC</u> -35del             | +136 bp                      |  | GAGC                      |
| E1E5                 | <u>TAATA</u> -208 del           |                              |  | CGGATACGGGGGGAGAGAGAGC    |

Figure S5, con't.

l) *Lig3*<sup>KO/KO</sup>; *Lig3* GFP + scrambled shRNA

| Translocation clones | Chr. 6                          | Chr. 11                                |                                    |
|----------------------|---------------------------------|----------------------------------------|------------------------------------|
|                      | CAGAA <u>GACTCCCGCCCA</u> TCTTC | (G) CTCG <u>CCGGATACGGGG</u> GGAGAGAGC |                                    |
| E2A3                 | CAGAA <u>GACTCCCGCCCA</u> TCTTC | T                                      | TCG <u>CCGGATACGGGG</u> GGAGAGAGC  |
| E1A7                 | CAGAA <u>GACTCCCGCCCA</u> TCTTC |                                        | <u>GCCGGATACGGGG</u> GGAGAGAGC     |
| E1G12                | CAGAA <u>GACTCCCGCCCA</u> TCTTC |                                        | <u>GCCGGATACGGGG</u> GGAGAGAGC     |
| E1F8                 | CAGAA <u>GACTCCCGCCCA</u> TCTTC | A                                      | <u>CCGGATACGGGG</u> GGAGAGAGC      |
| E2E10                | CAGAA <u>GACTCCCGCCCA</u> T     | T                                      | CTCG <u>CCGGATACGGGG</u> GGAGAGAGC |
| E2G11                | CAGAA <u>GACTCCCGCCCA</u> TCT   |                                        | <u>CCGGATACGGGG</u> GGAGAGAGC      |
| E2E12                | CAGAA <u>GACTCCCGCCCA</u>       |                                        | CTCG <u>CCGGATACGGGG</u> GGAGAGAGC |
| E2D11                | CAGAA <u>GACTCCCGCCCA</u> TCTT  |                                        | <u>CCGGATACGGGG</u> GGAGAGAGC      |
| E2H12                | CAGAA <u>GACTCCCGCCCA</u> TC    |                                        | <u>GGATACGGGG</u> GGAGAGAGC        |
| E1C9                 | CAGAA <u>GACTCCCGCC</u>         | +716 bp                                | <u>CCGGATACGGGG</u> GGAGAGAGC      |
| E1B5                 | CAGAA <u>GACTCCCGCC</u>         |                                        | <u>GGATACGGGG</u> GGAGAGAGC        |
| E2A2                 | CAGAA <u>GACTCCCGCC</u>         |                                        | <u>GGATACGGGG</u> GGAGAGAGC        |
| E2C9                 | CAGAA <u>GACTCCCGCC</u>         |                                        | <u>GGATACGGGG</u> GGAGAGAGC        |
| E2C10                | CAGAA <u>GACTCCCGCCCA</u> T     |                                        | <u>ACGGGG</u> GGAGAGAGC            |
| E2E1                 | CAGAA <u>GACTCCCGCC</u>         | AGA                                    | <u>ATACGGGG</u> GGAGAGAGC          |
| E1F1                 | CAGAA <u>GACTC</u>              |                                        | <u>GCCGGATACGGGG</u> GGAGAGAGC     |
| E1G8                 | CAGAA <u>GACTCCCG</u>           |                                        | <u>GATACGGGG</u> GGAGAGAGC         |
| E1H12                | CAGAA <u>GACTCCCG</u>           |                                        | <u>GATACGGGG</u> GGAGAGAGC         |
| E2A6                 | CAGAA <u>GACTCCCG</u>           |                                        | <u>GATACGGGG</u> GGAGAGAGC         |
| E1G3                 | CAGAA <u>GACT</u>               |                                        | <u>GGATACGGGG</u> GGAGAGAGC        |
| E2B11                | CAGAA <u>GAC</u>                | AT                                     | <u>CCGGATACGGGG</u> GGAGAGAGC      |
| E2F5                 | CAGAA <u>GACTCCCG</u>           |                                        | <u>GGGAGAGAGC</u>                  |
| E2E6                 | CAGAA <u>GA</u>                 |                                        | <u>TACGGGG</u> GGAGAGAGC           |
| E2B4                 | CAGAA <u>GAC</u>                |                                        | <u>GGGGGGAGAGAGC</u>               |
| E1H4                 | CAGAA <u>G</u>                  | G                                      | <u>ACGGGG</u> GGAGAGAGC            |
| E1C7                 | CAGAA <u>A</u>                  |                                        | <u>TACGGGG</u> GGAGAGAGC           |
| E2A1                 | CAGAA <u>GA</u>                 |                                        | <u>GGAGAGAGC</u>                   |
| E1C11                | CAGAA <u>GACTCCCG</u>           | AG                                     | <u>GC</u>                          |
| E1H6                 | CAGAA <u>GACTCCCGC</u>          | ACG                                    | -25 del TTAAC                      |
| E2E8                 | CAGAA <u>GA</u>                 |                                        | <u>GAGC</u>                        |
| E1F9                 | CAGAA <u>GACTC</u>              |                                        | -26 del TAAGT                      |
| E1C6                 | CAGAA <u>GA</u>                 |                                        | -28 del GTTGA                      |
| E2A7                 | CAGAA <u>G</u>                  |                                        | -29 del TTGA                       |
| E2E5                 | CAGAA <u>G</u>                  |                                        | -31 del CGGT                       |
| E2C3                 | CAGGT -40 del                   |                                        | <u>ACGGGG</u> GGAGAGAGC            |
| E2H9                 | CAGAA <u>GAC</u>                |                                        | -110 del AATTC                     |
| E1E3                 | GCAGG -60 del                   | TGCACACCTG                             | -96 del TTGTA                      |

Figure S5, con't.

J) *Lig3*<sup>KO/KO</sup>; *Lig3* GFP + *Lig1* shRNA

| Translocation clones | Chr. 6                   |                                |                         | Chr. 11                     |
|----------------------|--------------------------|--------------------------------|-------------------------|-----------------------------|
|                      | CAGAA GACTCCCGCCCA TCTTC | (G) CTCGCCGGATACGGGGG GAGAGAGC | Translocation junctions |                             |
| E1H5                 | CAGAA GACTCCCGCCCA TCTTC |                                |                         | CTCGCCGGATACGGGGG GAGAGAGC  |
| E2C1                 | CAGAA GACTCCCGCCCA TCTT  |                                |                         | GCTCGCCGGATACGGGGG GAGAGAGC |
| E3B3                 | CAGAA GACTCCCGCCCA TC    |                                |                         | CTCGCCGGATACGGGGG GAGAGAGC  |
| E3E1                 | CAGAA GACTCCCGCCCA TCTTC |                                |                         | GCCGGATACGGGGG GAGAGAGC     |
| E3B2                 | CAGAA GACTCCCGCCCA TCTTC |                                |                         | GCCGGATACGGGGG GAGAGAGC     |
| E2H10                | CAGAA GACTCCCGCCCA TCT   |                                |                         | CGCCGGATACGGGGG GAGAGAGC    |
| E3C2                 | CAGAA GACTCCCGCCCA TCT   |                                |                         | CGCCGGATACGGGGG GAGAGAGC    |
| E2F10                | CAGAA GACTCCCGCCCA T     |                                |                         | GCTCGCCGGATACGGGGG GAGAGAGC |
| E2A6                 | CAGAA GACTCCCGCCCA TC    |                                |                         | CGCCGGATACGGGGG GAGAGAGC    |
| E3G5                 | CAGAA GACTCCCGCCCA       |                                |                         | CTCGCCGGATACGGGGG GAGAGAGC  |
| E1C4                 | CAGAA GACTCCCGCCCA TC    |                                |                         | CGGATACGGGGG GAGAGAGC       |
| E3H1                 | CAGAA GACTCCCGCCCA TCT   |                                |                         | CCGGATACGGGGG GAGAGAGC      |
| E2B1                 | CAGAA GACTCCCGCCCA T     |                                |                         | ACGGGGG GAGAGAGC            |
| E1D2                 | CAGAA GACTCCCGCCCA T     |                                |                         | GCCGGATACGGGGG GAGAGAGC     |
| E3D10                | CAGAA GACTCCCGCCCA TC    |                                |                         | CCGGATACGGGGG GAGAGAGC      |
| E2C10                | CAGAA GACTCCCG           |                                |                         | CTCGCCGGATACGGGGG GAGAGAGC  |
| E2D6                 | CAGAA GACTCCCGCC         |                                |                         | GGATACGGGGG GAGAGAGC        |
| E2G12                | CAGAA GACTCCCGCC         |                                |                         | GGATACGGGGG GAGAGAGC        |
| E1A11                | CAGAA GACTCCCG           |                                | T                       | GCCGGATACGGGGG GAGAGAGC     |
| E3E3                 | CAGAA GACTCCCGCCCA TCTTC | +183 bp                        |                         | GGGGG GAGAGAGC              |
| E1B7                 | CAGAA GACTCCCGCC         |                                |                         | GGATACGGGGG GAGAGAGC        |
| E1H12                | CAGAA GACTCCCGCC         |                                |                         | GGATACGGGGG GAGAGAGC        |
| E2H1                 | CAGAA GACTCCCGCC         |                                |                         | GGATACGGGGG GAGAGAGC        |
| E3F4                 | CAGAA GACTCCCGCC         |                                |                         | GGATACGGGGG GAGAGAGC        |
| E3F7                 | CAGAA GACTCCCGCC         |                                |                         | GGATACGGGGG GAGAGAGC        |
| E3E11                | CAGAA GACTCCCGCC         |                                |                         | GGATACGGGGG GAGAGAGC        |
| E2H4                 | CAGAA GACTCCCGCCCA       |                                |                         | TACGGGGG GAGAGAGC           |
| E2E11                | CAGAA GACTCCCGCCCA       |                                |                         | TACGGGGG GAGAGAGC           |
| E1B3                 | CAGAA GACTCCCGCCCA T     |                                |                         | ACGGGGG GAGAGAGC            |
| E3A9                 | CAGAA GACTCCCGCCCA       |                                |                         | ACGGGGG GAGAGAGC            |
| E3E8                 | CAGAA GACTCCCG           |                                |                         | CGGATACGGGGG GAGAGAGC       |
| E1F5                 | CAGAA GACTCCCG           |                                |                         | GCCGGATACGGGGG GAGAGAGC     |
| E1E12                | CAGAA GACTCCCG           |                                |                         | GATACGGGGG GAGAGAGC         |
| E2A5                 | CAGAA GACTCCCG           |                                |                         | GATACGGGGG GAGAGAGC         |
| E2E7                 | CAGAA GACTCCCG           |                                |                         | GATACGGGGG GAGAGAGC         |
| E2A1                 | CAGAA GACTCCCGCCCA       |                                |                         | CGGGGG GAGAGAGC             |
| E3C5                 | CAGAA GACTCCCG           |                                |                         | GCCGGATACGGGGG GAGAGAGC     |
| E3F10                | CAGAA GACTCCCG           |                                |                         | GGGGG GAGAGAGC              |
| E1A8                 | CAGAA GA                 |                                |                         | GAGAGC                      |
| E2B8                 | CAGAA A                  |                                |                         | TACGGGGG GAGAGAGC           |
| E1A12                | TTAAG -28 del            | +48 bp                         |                         | CGGATACGGGGG GAGAGAGC       |
| E1F10                | CAGAA                    |                                |                         | GAGAGAGC                    |
| E1B4                 | CAGAA GACTCCCG           |                                |                         | -25 del TTAAG               |
| E1C2                 | CAGAA A                  |                                |                         | GAGAGC                      |
| E1C7                 | CAGAA                    |                                |                         | GC                          |
| E2H8                 | CAGAA                    |                                |                         | GC                          |

Figure S5, con't.

J) *Lig3*<sup>KO/KO</sup>; *Lig3* GFP + Lig1 shRNA

|                      | Chr. 6                          |                         | Chr. 11                      |
|----------------------|---------------------------------|-------------------------|------------------------------|
|                      | CAGAA <u>GACTCCCGCCCA</u> TCTTC |                         | (G)CTCGCCGGATACGGGGGGAGAGAGC |
| Translocation clones |                                 | Translocation junctions |                              |
| E3G12                | <u>CAGA</u>                     |                         | GC                           |
| E2A12                | <u>CAGAAG</u>                   |                         | -37 del CGGTI                |
| E1C3                 | AGGTT -30 del                   | +55bp                   | -32 del GAAGC                |
| E2D10                | GCCTT -33 del                   |                         | -32 del GAAGC                |
| E3E2                 | CACCA -43 del                   | TAGCATTTAAGTGGGAAGATT   | -25 del TTAAG                |
| E1F9                 | <u>CAGGA</u> -59 del            |                         | GC                           |
| E1F1                 | CAGAA <u>GACTCCCG</u>           |                         | -89 del AAGT                 |
| E3H9                 | CAGA                            | GTCTTCCATCGAGGTA        | -161 del GATGA               |
| E3B11                | CCTAT -175 del                  |                         | <u>ACGGGGGGAGAGAGC</u>       |
