# Supplementary material for: DNA Ligase III Promotes Alternative Nonhomologous End-Joining during Chromosomal Translocation Formation
Source: PubMed Central journal article supplement (PMC3107202; doi:10.1371/journal.pgen.1002080), 2011-06-02

Figure S6

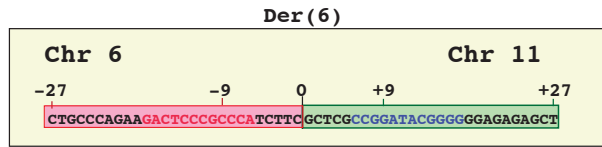

C) *Lig3*<sup>KO/KO</sup>; *Lig3* ΔZNF GFP

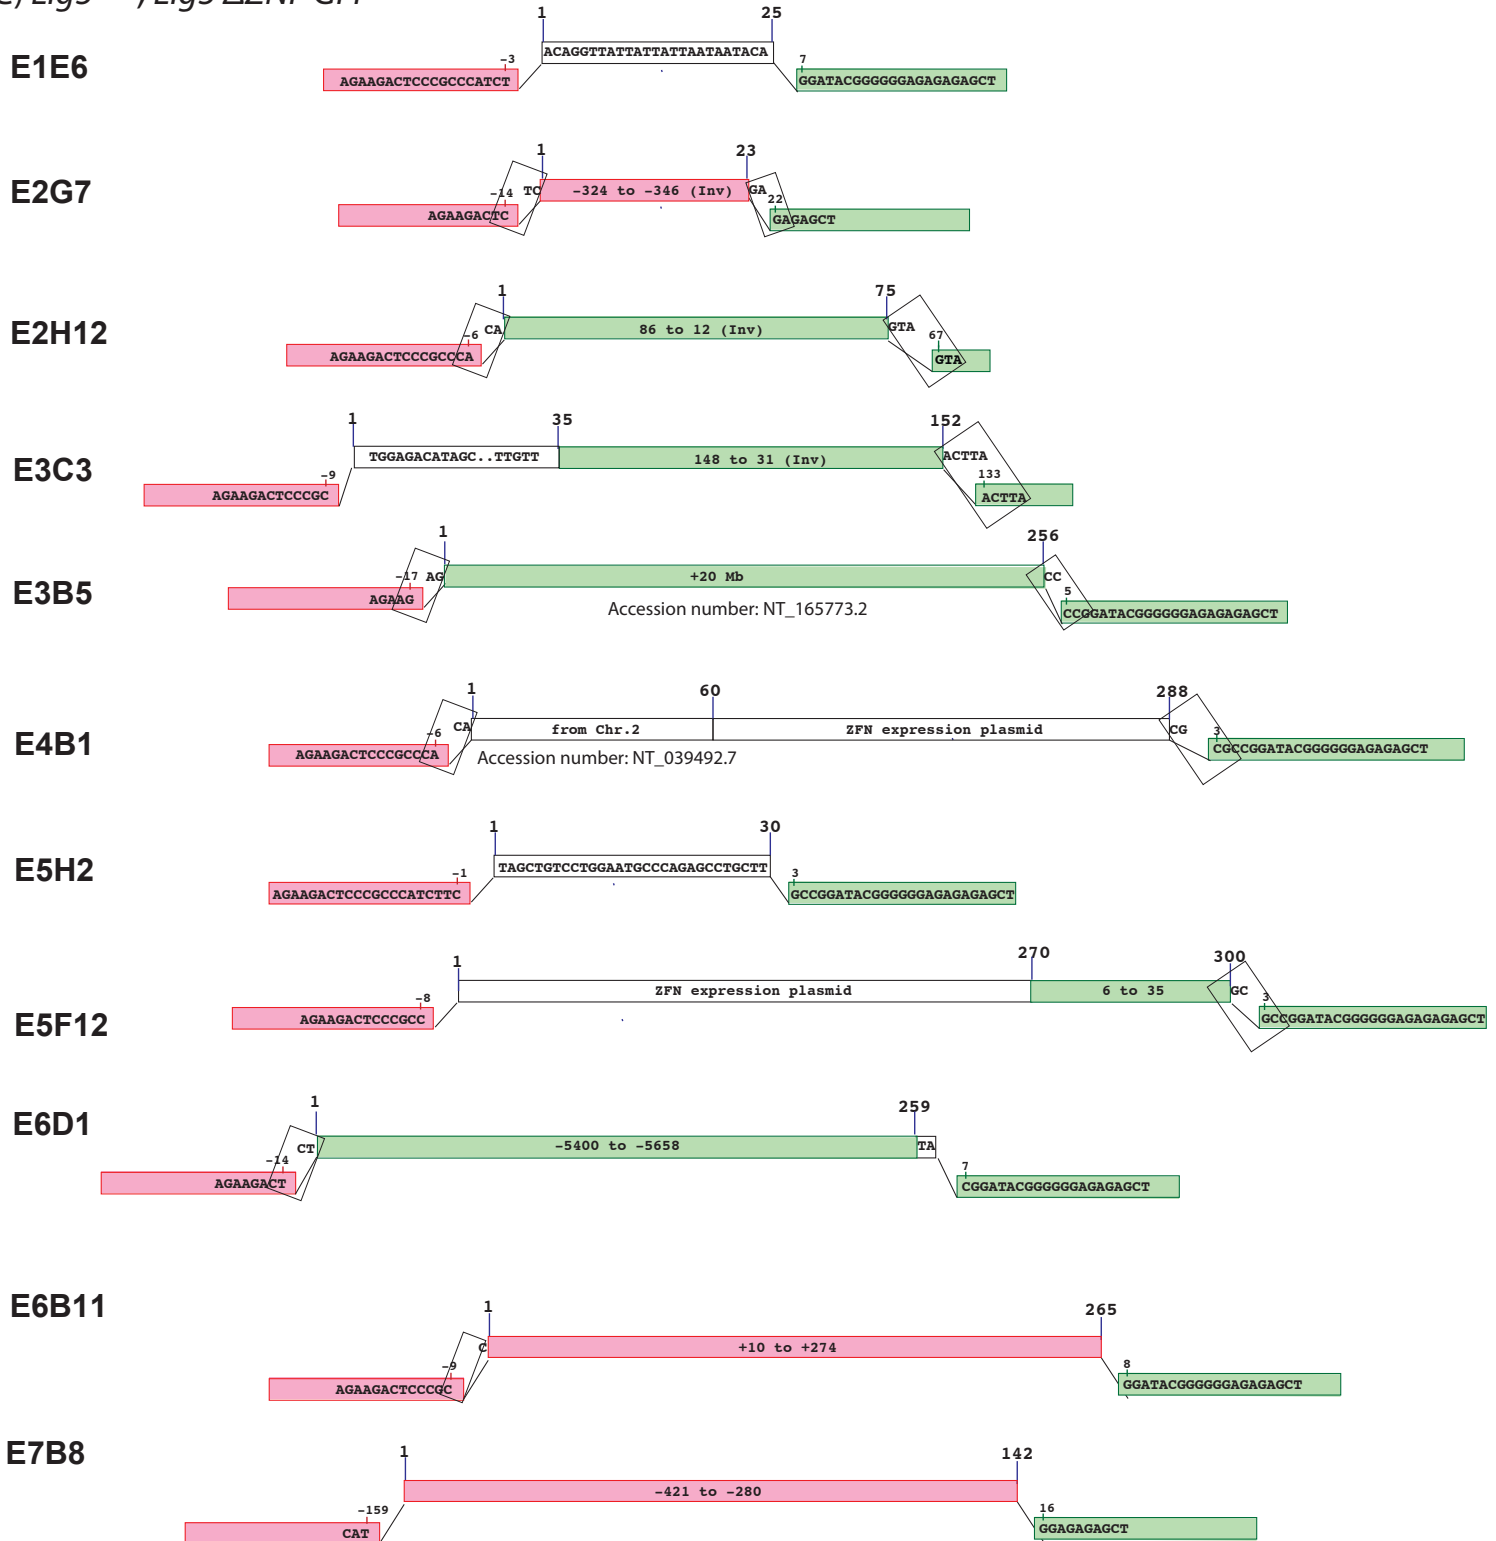

Figure S6

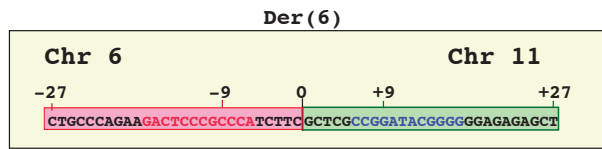

D) *Lig3*<sup>KO/KO</sup>; *Lig3* ΔBRCT GFP

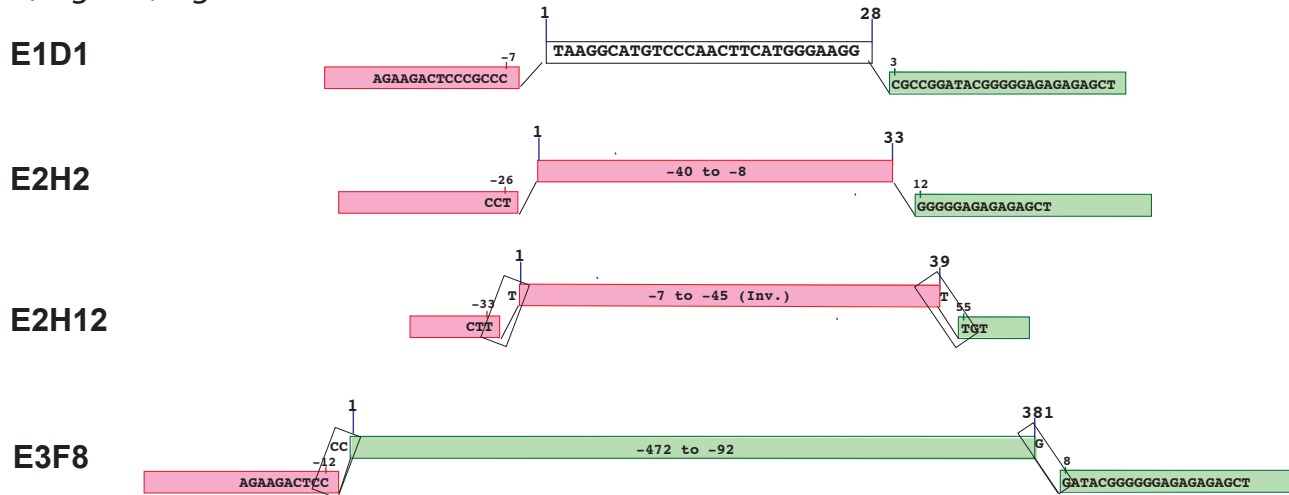

E) *Lig3*<sup>KO/KO</sup>; *MtLig1* GFP

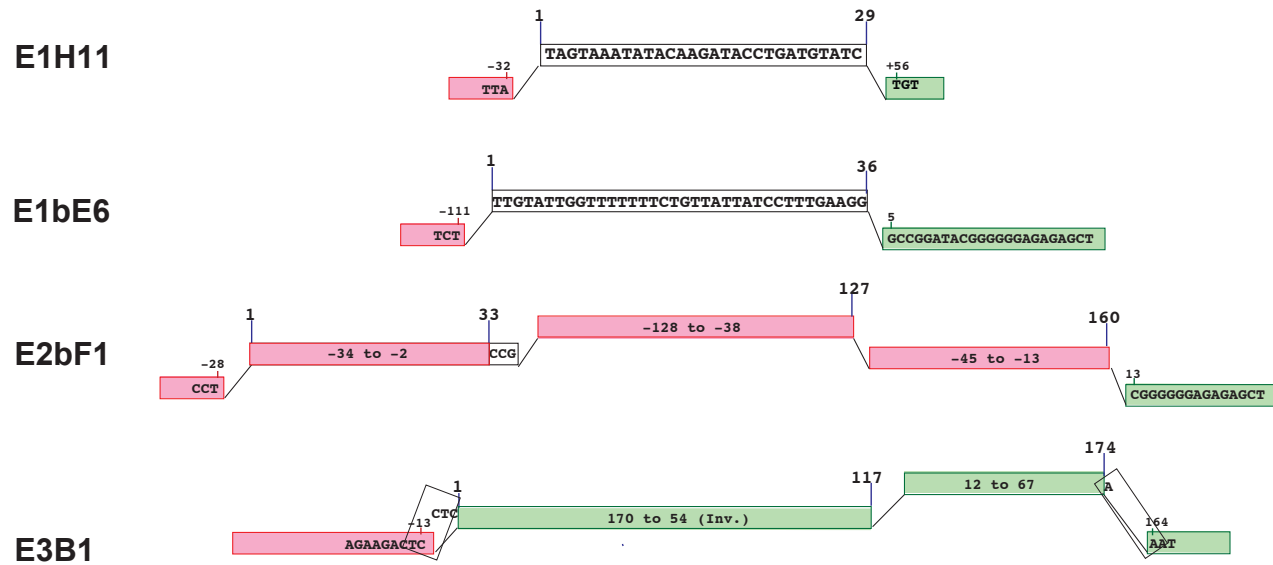

Figure S6

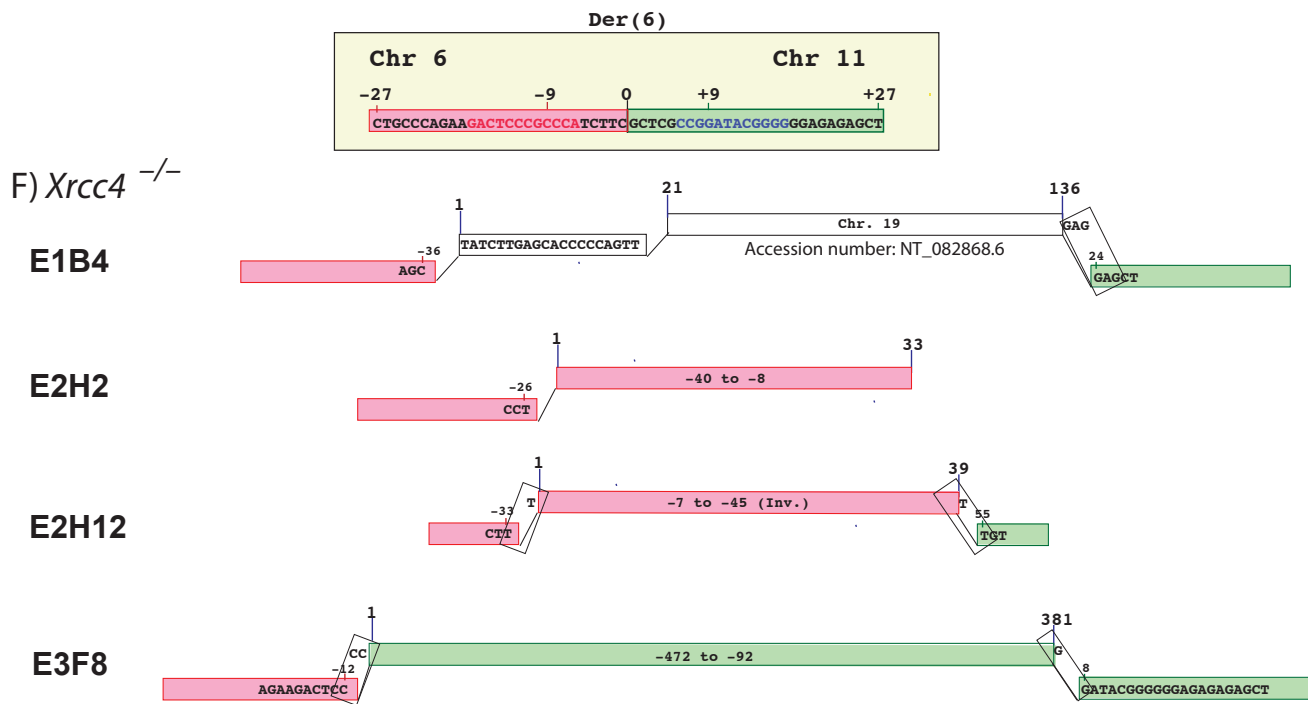

Supplement: pgen.1002080.s006.pdf [file pgen.1002080.s006.pdf]
