# Supplementary material for: DNA Ligase III Promotes Alternative Nonhomologous End-Joining during Chromosomal Translocation Formation
Source: PubMed Central journal article supplement (PMC3107202; doi:10.1371/journal.pgen.1002080), 2011-06-02

Figure S7

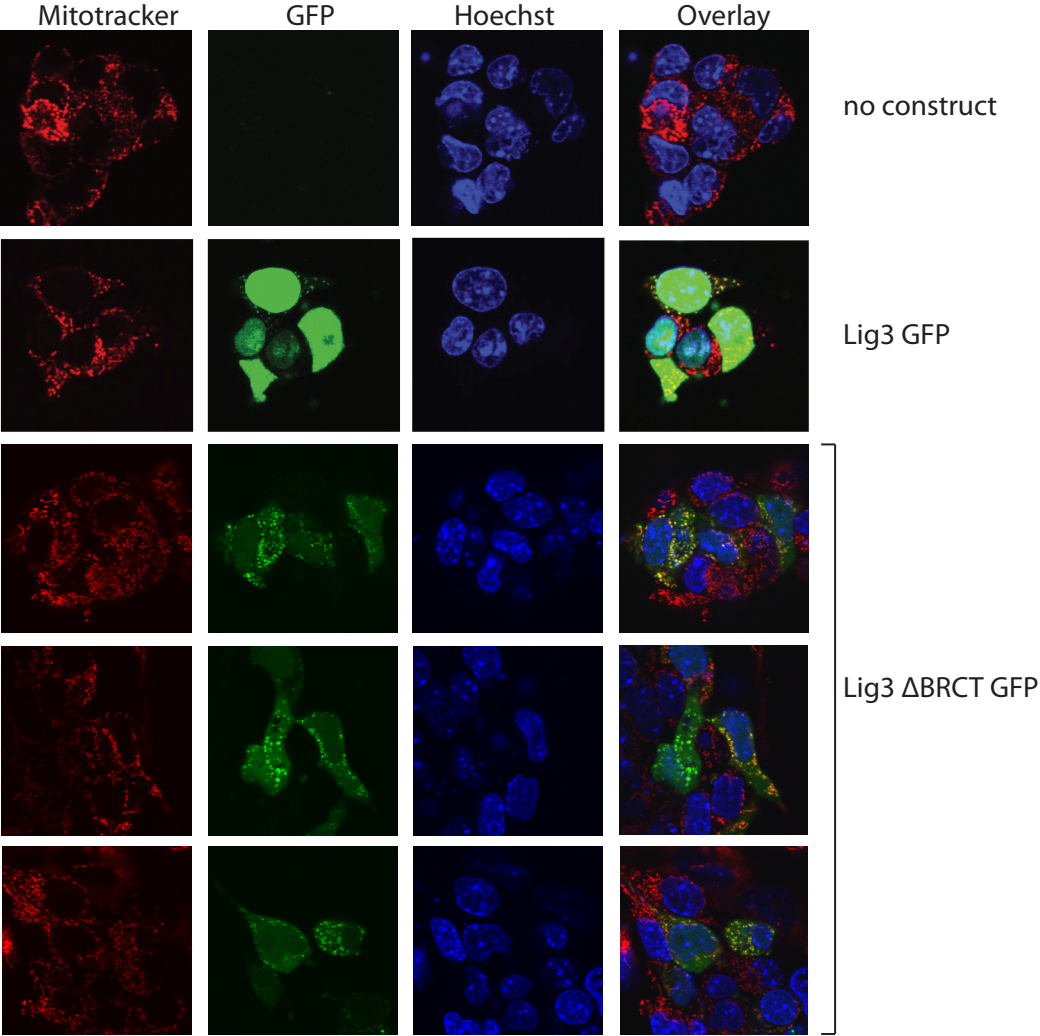

Supplement: pgen.1002080.s007.pdf [file pgen.1002080.s007.pdf]
